# Supplementary material
Source: PubMed Central journal article supplement (PMC4214553)
Supplement: NIHMS606249-supplement-01.pdf [file NIHMS606249-supplement-01.pdf]

## METHODS

### Human subjects

AA and NA subjects were classified based on physical examination, history, increased blood IgE levels (>50 IU/mL for allergic asthma), and positive skin tests to allergens (for AA subjects). HC subjects were defined as nonsmoking subjects greater than 13 years of age with a total serum IgE level of less than 25 IU/mL, negative skin test results (compared with positive histamine control), and no evidence of lung disease. In addition, there was no evidence of obstructive or restrictive lung disease for HC subjects on spirometric testing. Patients with FEV<sub>1</sub> values of less than 60% were considered to have severe disease. Those in the range of 60% to 80% were considered to have moderate disease, and those with FEV<sub>1</sub> values of greater than 80% were considered to have mild disease. Disease duration and disease severity match between NA and AA subjects was attempted. Age match for all clinical groups was also attempted as much as possible.

### Cell isolation

The CD4<sup>+</sup> T-cell fraction was first incubated with CD25 microbeads (clone BC96; Miltenyi Biotec, Bergisch Gladbach, Germany) to positively isolate CD4<sup>+</sup>CD25<sup>+</sup> T cells. This fraction was subsequently stained with CD25-phycoerythrin (clone 4E3, Miltenyi Biotec) and CD127-allophycocyanin (clone SB199; BioLegend, San Diego, Calif) antibodies and eventually sorted for CD4<sup>+</sup>CD25<sup>hi</sup>CD127<sup>lo</sup>/<sup>-</sup> Treg cells. The flowthrough fraction after magnetic purification contained CD4<sup>+</sup>CD25<sup>-</sup> cells (non-Treg cells). Cells were rested in RPMI, 10% FBS, and 1% L-glutamine after purification for 2 hours before undergoing downstream assays. The purity of each fraction was confirmed to be more than 95% with Foxp3 staining (clone 206D, BioLegend). All procedures were performed with manufacturers' standard protocols.

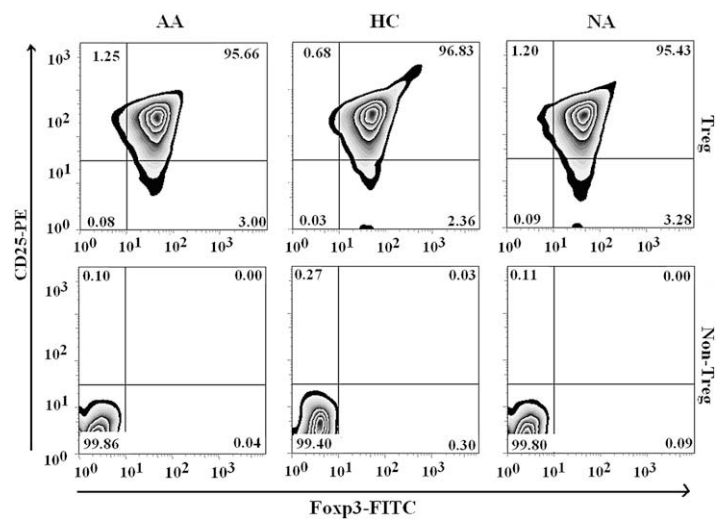

**FIG E1.** Purity of Treg and non-Treg cells. Expression of CD25 and Fxp3 by purified Treg and non-Treg cells in representative AA, HC, and NA subjects. *PE*, Phycoerythrin; *FITC*, fluorescein isothiocyanate.

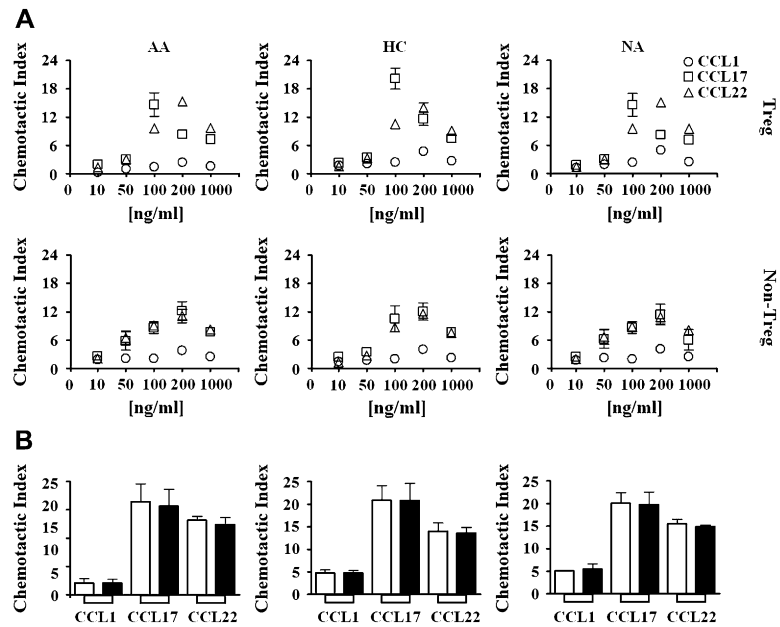

**FIG E2.** Titration of chemokines used in chemotaxis assays. **A**, Titration of chemokine dosage for each clinical group. **B**, Comparison between chemotactic responses of flow cytometry–sorted Treg cells (*open bars*) and flow cytometry– and magnetic bead–sorted Treg cells (*solid bars*) to CCL1, CCL17, and CCL22 in each clinical group. Data represented means and SDs from 3 and 5 representatives from each clinical group in Fig E2, *A* and *B*, respectively. In Fig E2, *B*, the Wilcoxon test was used for paired analyses because the data were not normally distributed.

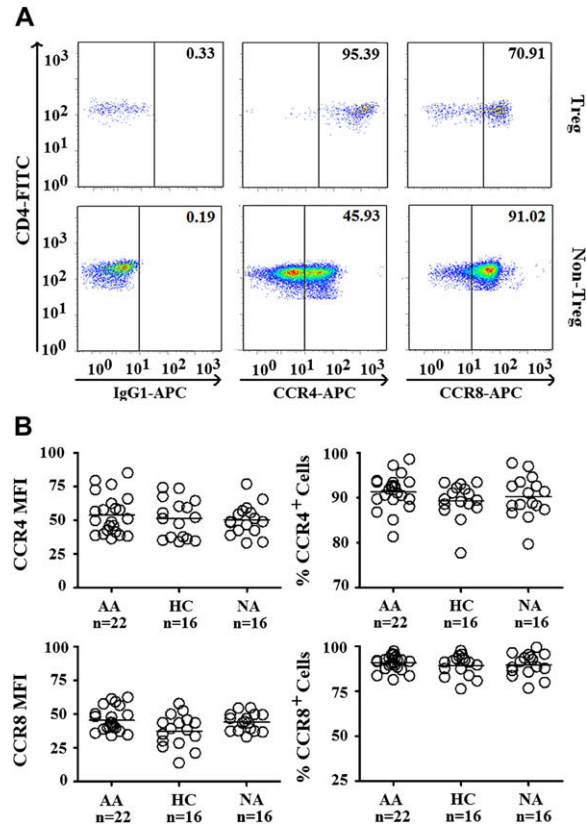

**FIG E3.** CCR4 and CCR8 expression in Treg and non-Treg cells. **A**, Gating of CCR4<sup>+</sup> cells and CCR8<sup>+</sup> cells in Treg and non-Treg cells. Negative thresholds for CCR4 and CCR8 expression by Treg and non-Treg cells were derived from isotype controls. FITC, Fluorescein isothiocyanate; APC, allophycocyanin. **B**, CCR4 and CCR8 expression by non-Treg cells. The Kruskal-Wallis test was used for the analysis of the percentages of CCR4<sup>+</sup> cells because the data were not normally distributed. ANOVA was used for the rest of the analyses because the data had normal distributions and equal variances. MFI, Mean fluorescence intensity.

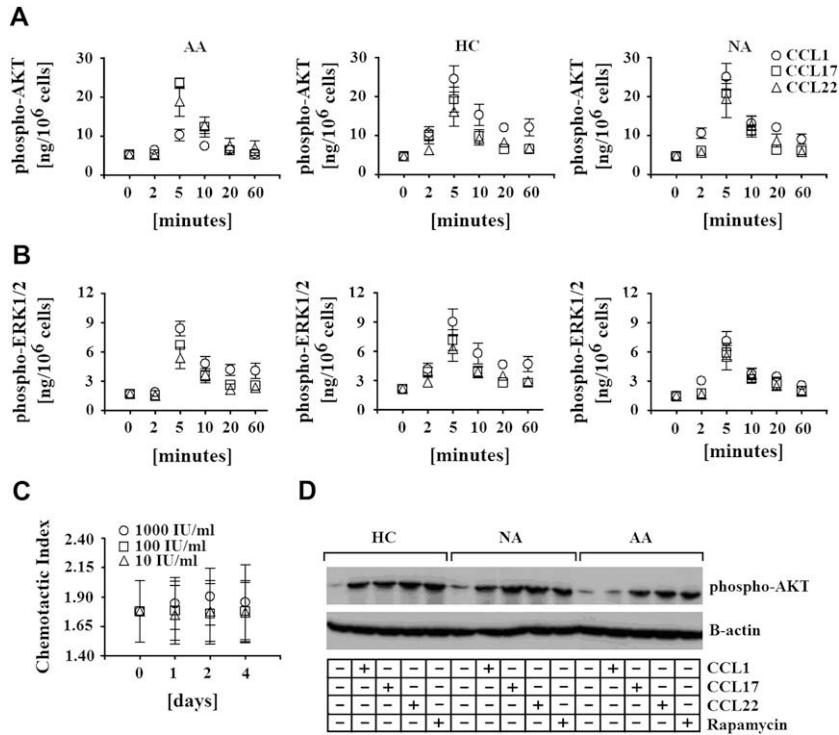

**FIG E4.** Phosphoprotein analysis of chemokine signaling pathways. **A**, Kinetics of AKT phosphorylation in response to CCL1, CCL17, and CCL22 in each clinical group. **B**, Kinetics of ERK1/2 phosphorylation in response to CCL1, CCL17, and CCL22 in each clinical group. **C**, Titration of IL-2 dosage and kinetics of IL-2 incubation with respect to its effects on CCL1 dysfunction in AA Treg cells. Data represented means and SDs from 3 representatives from each clinical group. "0" time points mean baseline chemotactic responses without any IL-2 supplement or any added chemokines. **D**, Expression of phospho-AKT in Treg cells from AA, NA, and HC representatives in response to CCL1, CCL17, CCL22, and rapamycin (positive control). Unstimulated samples were used as negative controls.  $\beta$ -Actin expression was used as control for equal loading. Optimal concentrations and stimulation times used in Western blot experiments were derived from previous phospho-ELISA works.

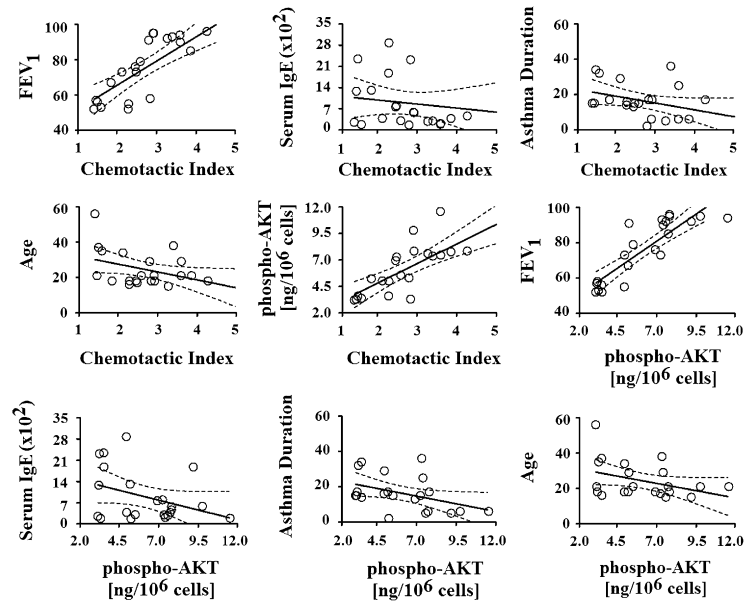

**FIG E5.** Correlation of *in vitro* cell functions and clinical parameters of allergic asthma. The Spearman test was used for correlation analyses of nonnormally distributed data. *Dotted lines* represent the 95% CIs. *Solid lines* represented the best-fitted lines of the data.

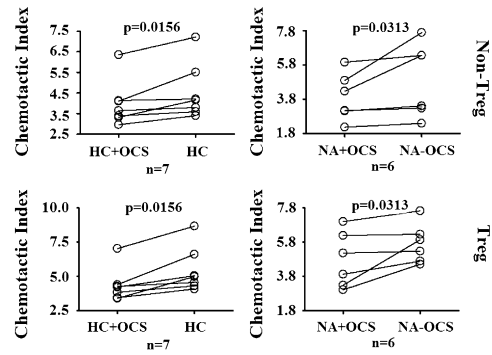

**FIG E6.** Effects of oral corticosteroids (OCS) on CCL1 chemotactic responses of Treg and non-Treg cells from HC and NA subjects. Comparisons were made between cells from the same NA subjects that were collected with and without steroid withdrawal enforcement. HC cells were incubated with 1000 ng/mL OCS for 24 hours before being subjected to downstream assays. The Wilcoxon test was used for the paired analysis of nonnormally distributed data.

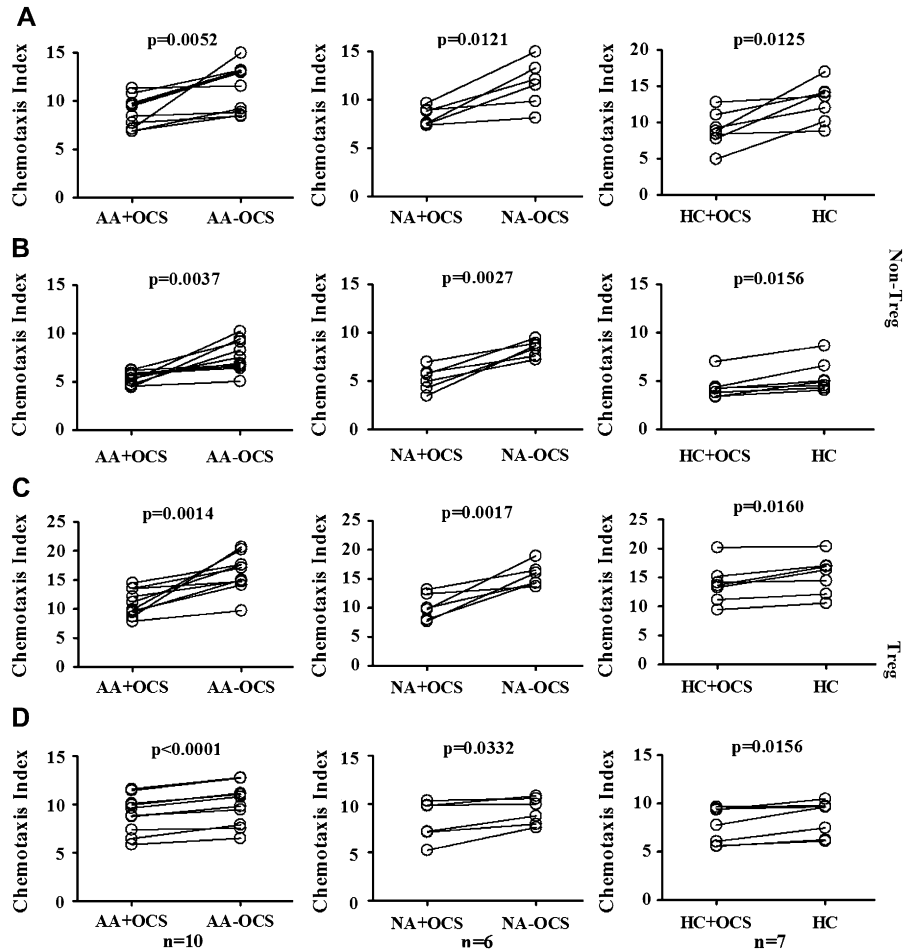

**FIG E7.** Effects of oral corticosteroids (OCS) on CCL17 and CCL22 chemotactic responses of Treg and non-Treg cells from AA, NA, and HC subjects. **A**, Chemotaxis assays of non-Treg cells toward CCL17. **B**, Chemotaxis assays of non-Treg cells toward CCL22. **C**, Chemotaxis assays of Treg cells toward CCL17. **D**, Chemotaxis assays of Treg cells toward CCL22. Comparisons were made between cells from the same AA (or NA) subjects collected with and without steroid withdrawal enforcement. HC cells were incubated with 1000 ng/mL OCS for 24 hours before being subjected to downstream assays. The Wilcoxon tests were used for the paired analyses of nonnormally distributed data (HC Treg and non-Treg cells in CCL22 chemotaxis assays). Paired *t* tests were used for all other analyses because the data were normally distributed.



**TABLE E1.** Subject demographics

| Patient ID | Age (y)       | Asthma duration (y) | Severity | Medication                                  |
|------------|---------------|---------------------|----------|---------------------------------------------|
| AA1        | 56            | 15                  | Severe   | Fluticasone, salmeterol: 500 mg twice daily |
| AA2        | 35            | 32                  | Severe   | Fluticasone, salmeterol: 500 mg twice daily |
| AA3        | 37            | 34                  | Severe   | Fluticasone, salmeterol: 500 mg twice daily |
| AA4        | 21            | 15                  | Severe   | Fluticasone, salmeterol: 500 mg twice daily |
| AA5        | 18            | 17                  | Severe   | Fluticasone, salmeterol: 500 mg twice daily |
| AA6        | 16            | 14                  | Severe   | Fluticasone, salmeterol: 500 mg twice daily |
| AA7        | 18            | 16                  | Severe   | Fluticasone, salmeterol: 250 mg twice daily |
| AA8        | 34            | 29                  | Moderate | Fluticasone, salmeterol: 250 mg twice daily |
| AA9        | 18            | 13                  | Moderate | Fluticasone, salmeterol: 250 mg twice daily |
| AA10       | 17            | 15                  | Moderate | Fluticasone, salmeterol: 250 mg twice daily |
| AA11       | 21            | 15                  | Moderate | Fluticasone, salmeterol: 250 mg twice daily |
| AA12       | 18            | 17                  | Moderate | Fluticasone, salmeterol: 250 mg twice daily |
| AA13       | 15            | 5                   | Mild     | Albuterol puffs, 2/wk                       |
| AA14       | 21            | 6                   | Mild     | Albuterol puffs, 2/wk                       |
| AA15       | 29            | 25                  | Mild     | Albuterol puffs, 2/wk                       |
| AA16       | 29            | 2                   | Mild     | Albuterol puffs, 2/wk                       |
| AA17       | 38            | 36                  | Mild     | Albuterol puffs, 1.5/wk                     |
| AA18       | 18            | 17                  | Mild     | Albuterol puffs, 1/wk                       |
| AA19       | 18            | 17                  | Mild     | Albuterol puffs, 1/wk                       |
| AA20       | 15            | 5                   | Mild     | Albuterol puffs, 1/wk                       |
| AA21       | 21            | 6                   | Mild     | Albuterol puffs, 1/wk                       |
| AA22       | 21            | 6                   | Mild     | Albuterol puffs, 1/wk                       |
|            | 24.27 ± 2.179 | 16.23 ± 2.07        |          |                                             |
| NA1        | 15            | 3                   | Severe   | Fluticasone, salmeterol: 500 mg twice daily |
| NA2        | 28            | 23                  | Severe   | Fluticasone, salmeterol: 500 mg twice daily |
| NA3        | 47            | 19                  | Severe   | Fluticasone, salmeterol: 500 mg twice daily |
| NA4        | 22            | 9                   | Severe   | Fluticasone, salmeterol: 500 mg twice daily |
| NA5        | 18            | 23                  | Severe   | Fluticasone, salmeterol: 500 mg twice daily |
| NA6        | 25            | 5                   | Severe   | Fluticasone, salmeterol: 500 mg twice daily |
| NA7        | 42            | 21                  | Moderate | Fluticasone, albuterol, puffs 1/wk          |
| NA8        | 44            | –                   | Moderate | Albuterol puffs, 2/wk                       |
| NA9        | 45            | 25                  | Mild     | Albuterol puffs, 2/wk                       |
| NA10       | 55            | –                   | Mild     | Albuterol puffs, 2/wk                       |
| NA11       | 25            | 5                   | Mild     | Albuterol puffs, 2/wk                       |
| NA12       | 19            | –                   | Mild     | Albuterol puffs, 1/wk                       |
| NA13       | 11            | 3                   | Mild     | Albuterol puffs, 1/wk                       |
| NA14       | 15            | 13                  | Mild     | Albuterol puffs, 1/wk                       |
| NA15       | 19            | 4                   | Mild     | Albuterol puffs, 1/wk                       |
| NA16       | 35            | 15                  | Mild     | Albuterol puffs, 1/wk                       |
|            | 29.06 ± 3.42  | 12.92 ± 2.37        |          |                                             |

**TABLE E2.** Chemotactic index, phospho-AKT level, and clinical parameters of asthma of subjects

| Patient ID | Comments                                          | Allergic status  | FEV <sub>1</sub> | Chemotactic index | Phospho-AKT  |
|------------|---------------------------------------------------|------------------|------------------|-------------------|--------------|
| AA1        | Steroid withdrawal 12 h before second blood draw* | Tree, mold       | 52               | 1.429988159       | 3.193611     |
| AA2        | Steroid withdrawal 12 h before second blood draw* | Cat              | 53               | 1.609667123       | 3.366863     |
| AA3        | Steroid withdrawal 12 h before second blood draw* | Tree, dust mite  | 56               | 1.521250439       | 3.561444     |
| AA4        | Steroid withdrawal 12 h before second blood draw* | Tree             | 57               | 1.483614232       | 3.251166     |
| AA5        | Steroid withdrawal 12 h before second blood draw* | Dog              | 58               | 2.847170972       | 3.289645     |
| AA6        | Steroid withdrawal 12 h before blood draw         | Mold             | 52               | 2.293563721       | 3.581024     |
| AA7        | Steroid withdrawal 12 h before blood draw         | Tree, grass      | 55               | 2.302546396       | 4.988029     |
| AA8        | Steroid withdrawal 12 h before blood draw         | Cat, mold        | 73               | 2.135721493       | 5.009265     |
| AA9        | Steroid withdrawal 12 h before blood draw         | Weed             | 76               | 2.470334743       | 6.934832     |
| AA10       | Steroid withdrawal 12 h before blood draw         | Weed, grass      | 73               | 2.496126877       | 7.268035     |
| AA11       | Steroid withdrawal 12 h before blood draw         | Grass, dust mite | 79               | 2.601930991       | 5.548491     |
| AA12       | Steroid withdrawal 12 h before blood draw         | Tree, dust mite  | 67               | 1.860215054       | 5.223027     |
| AA13       | Steroid withdrawal 12 h before second blood draw* | Grass            | 92               | 3.278354633       | 7.607166     |
| AA14       | Steroid withdrawal 12 h before second blood draw* | Mold             | 85               | 3.866158656       | 7.754362     |
| AA15       | Steroid withdrawal 12 h before second blood draw* | Grass, mold      | 90               | 3.608086785       | 7.43685      |
| AA16       | Steroid withdrawal 12 h before second blood draw* | Grass            | 91               | 2.810528316       | 5.287654     |
| AA17       | Steroid withdrawal 12 h before second blood draw* | Tree, grass      | 93               | 3.407161926       | 7.364318     |
| AA18       | Steroid withdrawal 12 h before blood draw         | Cat              | 95               | 2.937595129       | 7.828383     |
| AA19       | Steroid withdrawal 12 h before blood draw         | Dog, dust mite   | 96               | 4.27696832        | 7.828383     |
| AA20       | Steroid withdrawal 12 h before blood draw         | Weed, grass      | 92               | 5.168918919       | 9.211026     |
| AA21       | Steroid withdrawal 12 h before blood draw         | Tree, cat        | 94               | 3.599328013       | 11.5698      |
| AA22       | Steroid withdrawal 12 h before blood draw         | Tree, grass      | 95               | 2.920969832       | 9.775785     |
|            |                                                   |                  | 76.09 ± 3.62     | 2.769 ± 0.21      | 6.222 ± 0.51 |
| NA1        | Steroid withdrawal 12 h before blood draw         | None             | 51               | 4.751769975       | 10.81055747  |
| NA2        | Steroid withdrawal 12 h before blood draw         | None             | 53               | 4.396421531       | 12.38808571  |
| NA3        | Steroid withdrawal 12 h before blood draw         | None             | 55               | 5.292004049       | 16.55371966  |
| NA4        | Steroid withdrawal 12 h before blood draw         | None             | 58               | 5.619329096       | 34.03530547  |
| NA5        | Steroid withdrawal 12 h before blood draw         | None             | 59               | 4.505046315       | 30.92297959  |
| NA6        | Steroid withdrawal 12 h before blood draw         | None             | 59               | 6.415036675       | 25.62070896  |
| NA7        | Steroid withdrawal 12 h before second blood draw* | None             | 69               | 4.508648039       | 30.92297959  |
| NA8        | Steroid withdrawal 12 h before second blood draw* | None             | 85               | 6.259968102       | 14.76721929  |
| NA9        | Steroid withdrawal 12 h before second blood draw* | None             | 85               | 5.936614467       | 11.86923077  |
| NA10       | Steroid withdrawal 12 h before second blood draw* | None             | 88               | 5.26615112        | 19.63818182  |
| NA11       | Steroid withdrawal 12 h before second blood draw* | None             | 95               | 7.620159348       | 30.92297959  |
| NA12       | Steroid withdrawal 12 h before second blood draw* | None             | 91               | 4.69254835        | 24.688       |
| NA13       | Steroid withdrawal 12 h before blood draw         | None             | 88               | 4.297269841       | 16.14878882  |
| NA14       | Steroid withdrawal 12 h before blood draw         | None             | 83               | 8.224229909       | 10.49745902  |
| NA15       | Steroid withdrawal 12 h before blood draw         | None             | 95               | 5.533470296       | 24.73900826  |
| NA16       | Steroid withdrawal 12 h before blood draw         | None             | 94               | 8.101769032       | 10.38476839  |
|            |                                                   |                  | 75.5 ± 4.24      | 5.714 ± 0.33      | 20.31 ± 2.12 |

Summary data represent means and SDs.

\*These subjects donated blood twice. Steroid withdrawal was not enforced in the first donation. Subjects did not have any changes in treatment between 2 blood donations. Chemotactic and AKT phosphorylation data represented results from experiments that were all performed with cells from subjects on steroid withdrawal.
